# Supplementary material
Source: PubMed Central journal article supplement (PMC3719133)
Supplement: NIHMS464507-supplement-01.pdf [file NIHMS464507-supplement-01.pdf]

## Supplement 1:

### Material and Methods

*Oligonucleotides used to amplify PCSK1's 14 exons:*

Ex. 1 (232bp): (F) ACTCTTGTTCAAGCGAGTG; (R) GTTTCTTGAAAGTGGAAGT  
 Ex. 2 (510bp): (F) CTCAACCAATTCAACCCAATC; (R) CCCGTGACACAAGTTTACCTATG  
 Ex. 3 (196bp): (F) GAGGAAGTATACAGAGGTAG; (R) CATAGTCCTTCTGTAGGTAC  
 Ex. 4 (598bp): (F) TTATTTCAATGCCACTGGTAC; (R) GTAGTTCAAAGAGAAGGAGCACAG  
 Ex. 5 (265bp): (F) AATGCTGCCACAGTGTATA; (R) ACATTTCTGAGCACTGGA  
 Ex. 6 (199bp): (F) ACCTATGCCCATTAATTCA; (R) GCTATAGGGACAATCCTCTG  
 Ex. 7 (526bp): (F) TTCCTTCTGTGGTGTGTCAGTAGC; (R) AGCCTTAACTCCCATCCCTC  
 Ex. 8 (669bp): (F) GATTGAAGCAGAAAGAAAGAGAGG; (R) TCAGTCGTACCAAAGGTCAGTTA  
 Ex. 9 (172bp): (F) ACTCCTCACGTGTTCTCCCT; (R) TATCAAGCTTTTCTGGGCCT  
 Ex. 10 (339bp): (F) TCCCTGAATGGAGATGCT; (R) AGGAGATACTTACCTGGGCTC  
 Ex. 11 (268bp): (F) CGAAGGAAGTTTGGATATAC; (R) TTGAATCATTCAACTTACAC  
 Ex. 12 (224bp): (F) ATCAGATGCTAGAGTGTATC; (R) TCATCCTCTCATTTACTT  
 Ex. 13 (545bp): (F) CAGCTTTCCAAGAACACATCC; (R) CCATGTTTGACTTATTTCTCTGC  
 Ex. 14 (596bp): (F) GCTCCCAGTCTTGAAGTCTCTC; (R) CAACCACTTCAGACACAGGC

*PCR was performed using ~10ng of genomic DNA by standard methods: denaturation: 95°C/5:00 (denaturation: 95°C/0:30; annealing: T<sub>A</sub>°C/0:30; extension: 72°C/0:40) for 35 cycles, and a final extension: 72°C/7:00. Run exons #2, 4, 7, 8, 13, 14 at T<sub>A</sub> = 60°C; exons #1, 5, 6, 11 at T<sub>A</sub> = 53°C; and exons #3, 9, 10, 12 at T<sub>A</sub> = 55°C. DNA was sequenced bidirectionally using standard methods.*

*Transient transfection of expression clones.* cDNAs encoding the various PC1/3 mutant variants were transfected into HEK293 cells, plated the previous day at a density of 2 x 10<sup>5</sup> cells per well in 24-well plates. Cells were transfected in quadruplicate with 200ng/well of each plasmid DNA using Lipofectamine 2000 (Invitrogen). Five hours post-transfection, 1ml of growth medium was added to each well and incubation continued for an additional 24h. The medium was then replaced with 300µl of OptiMEM (Invitrogen) containing 100µg/ml bovine aprotinin (Desert Biologicals). Cells were incubated for an additional 16-24h before conditioned medium and cells were harvested. Conditioned medium was analyzed first by enzyme assay. Both cells and medium were then subjected to SDS-PAGE followed by Western blotting using primary antiserum against the amino terminus of mature mouse PC1/3 followed by goat anti-β-actin antiserum (Santa Cruz Biotechnology) as a loading control<sup>12</sup>. Western blots were then probed with horseradish peroxidase-coupled secondary antiserum. Visualization of immunoreactive protein was accomplished using the SuperSignal Dura Substrate kit (Thermo Scientific). All transfections were performed independently at least three times.

## Results

### *Database assessment of identified PCSK1 variants:*

None of the variants were present in 1092 individuals of diverse ethnicities sequenced by the 1000 Genomes project (Phase 1 Integrated Variant Call Set, supp table XX). Furthermore, none of the variants were present in the 6500 NHLBI exomes representing individuals in the United States of European and African ancestry (NHLBI GO Exome Sequencing Project (ESP), Seattle, WA (URL: <http://evs.gs.washington.edu/EVS/>) ESP6500SI accessed 2012-11-26). None of the variants were found as homozygous in 218 exomes sequenced at UCLA, which included 8 Turkish and 20 Arab individuals from ethnic groups not represented in 1000 Genomes or NHLBI. (In the UCLA exomes, a single Caucasian individual was heterozygous for p.G593R and a single Arab individual was heterozygous for p.R405X.)

### *The ethnic groups and number of samples in 1000 Genomes:*

| <b><u>population</u></b> | <b><u>description</u></b>                              | <b><u>samples</u></b> |
|--------------------------|--------------------------------------------------------|-----------------------|
| ASW                      | Americans of African Ancestry in SW USA                | 61                    |
| CEU                      | Utah Residents w/ Northern & Western European ancestry | 85                    |
| CHB                      | Han Chinese in Beijing, China                          | 97                    |
| CHS                      | Southern Han Chinese                                   | 100                   |
| CLM                      | Colombians from Medellin, Colombia                     | 60                    |
| FIN                      | Finnish in Finland                                     | 93                    |
| GBR                      | British in England and Scotland                        | 89                    |
| IBS                      | Iberian population in Spain                            | 14                    |
| JPT                      | Japanese in Tokyo, Japan                               | 89                    |
| LWK                      | Luhya in Webuye, Kenya                                 | 97                    |
| MXL                      | Mexican Ancestry from Los Angeles USA                  | 66                    |
| PUR                      | Puerto Ricans from Puerto Rico                         | 55                    |
| TSI                      | Toscans in Italia                                      | 98                    |
| YRI                      | Yoruba in Ibadan, Nigeria                              | 88                    |

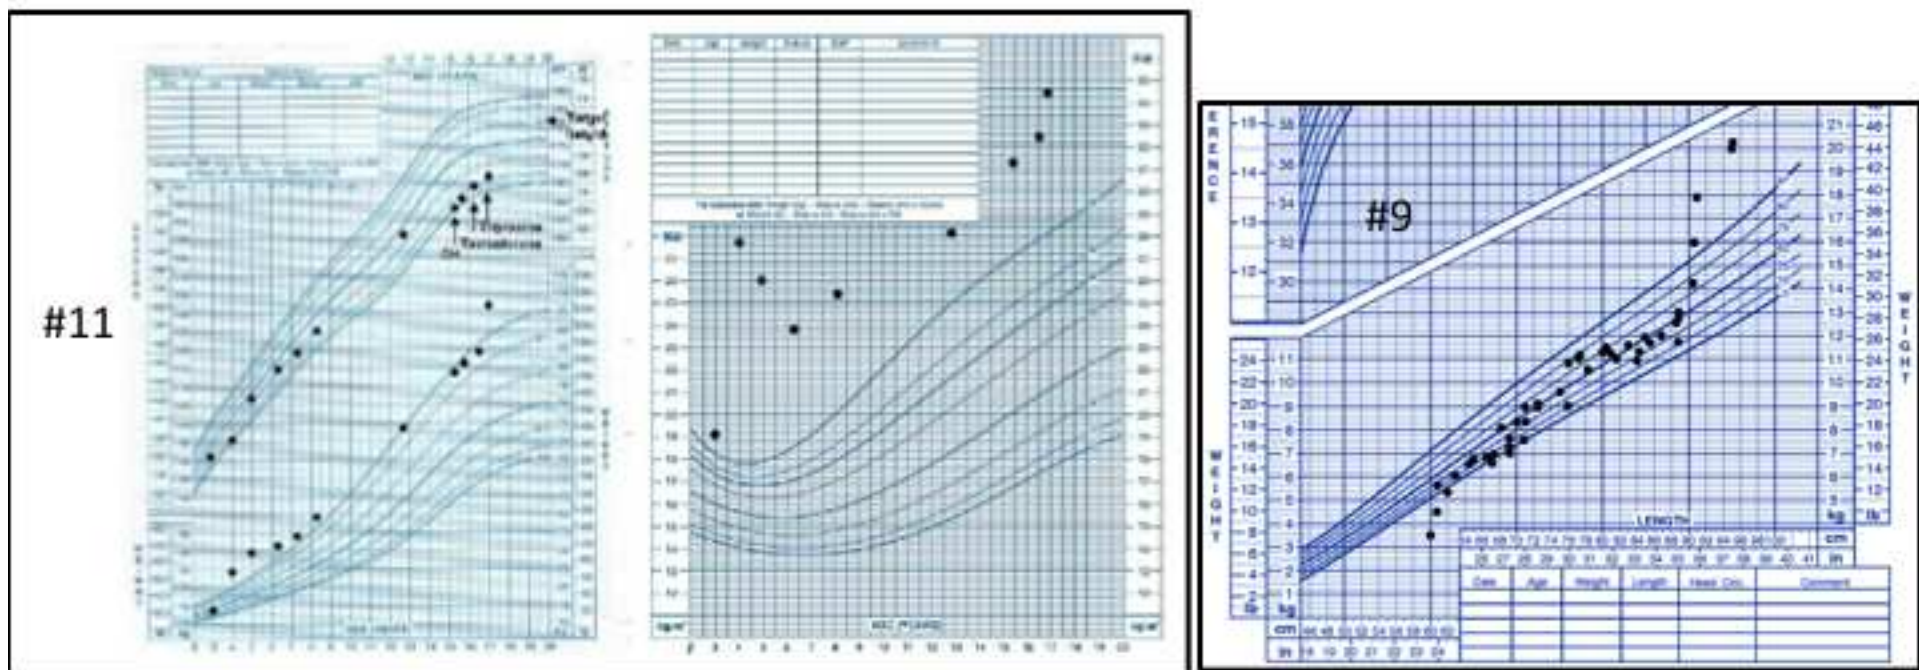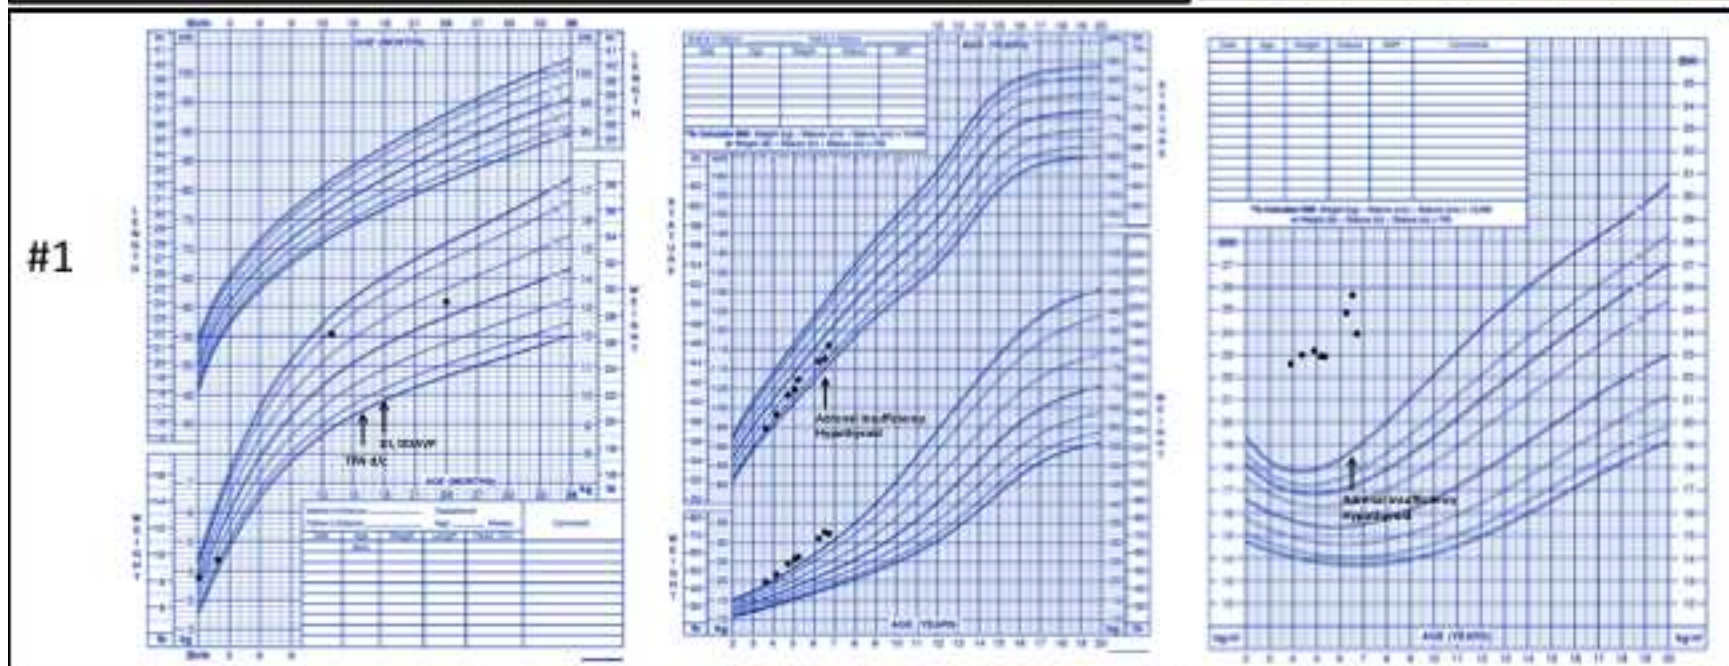

Supplement 2: Growth chart of three subjects (#1, #9 and #11)

| PROTEIN                                      | Processed by PC1/3 | Hormone Gene Symbol & Gene ID # | Mortality (Y/N) | PMID#              | Hormone Gene Symbol & Gene ID #          | Mortality (Y/N) | PMID#                        |
|----------------------------------------------|--------------------|---------------------------------|-----------------|--------------------|------------------------------------------|-----------------|------------------------------|
| <b>Hormone - peptide</b>                     |                    |                                 |                 |                    | <b>Hormone - receptor</b>                |                 |                              |
| Cholecystokinin                              | X                  | Cck: 12424                      | N               | 10330022           | Cckar(1): 12425                          | N               | 15314689                     |
| Gastrin                                      | X                  | Gast: 14459                     | N               | 9287997            | Cckbr(2): 12426                          | N               | 8978369; 8876222; 12688382   |
| Ghrelin                                      | X                  | Ghrl: 58991                     | N               | 14585959           | Ghnr: 208188                             | N               | 16322794                     |
| Glucose-dependent insulinotropic polypeptide | X                  | Gip: 14607                      | N/D             | N/D                | Gipr: 381853                             | N               | 10611300                     |
| Guanylin                                     | N/D                | Guca2a:14915                    | N               | 12466132; 15026148 | Gucy2c                                   | N               | 9344852; 21865642            |
| Uroguanylin                                  | N/D                | Guca2b:14916                    | N               | 14561709           | Gucy2c                                   | N               | 9344852; 21865642            |
| Peptide YY                                   | X                  | Pyy: 217212                     | N               | 16680491           | Npy1r: 18166, Npy2r: 18167, Npy6r: 18169 | N               | 12167864                     |
| Neurotensin/neuromedin N                     | X                  | Nts: 67405                      | N               | 11427716           | Ntsr1: 18216, Ntsr2: 18217               | N               | 15030383                     |
| GLP-1                                        | X                  | Gcg: 14526                      | N               | 22928026           | Gcgr: 14527, Glp1r: 14652                | N               | 8898756                      |
| GLP-2                                        | X                  | Gcg: 14526                      | N               | 22928026           | Glp2r: 93896                             | N               | 20546737                     |
| Secretin                                     | X                  | Sct: 20287                      | N               | 18534766           | Sctr: 319229                             | N               | 17283064                     |
| Somatostatin                                 | X                  | Sst: 20604                      | N               | 11430867           | Sstr1: 20605, Sstr2: 20606, Sstr5: 20609 | N               | 12752788                     |
| Galanin                                      | X                  | Gal: 14419                      | N               | 22698811           | Galr1 14427:, Galr2: 14428, Galr3: 14429 | N               | 21179451, 18554714, 17974627 |
| <b>Endocrine secreted protein</b>            |                    |                                 |                 |                    |                                          |                 |                              |
| Chromogranin A                               | X                  | Chga: 12652                     | N               | 16556729           | N/A                                      |                 |                              |
| Chromogranin B                               | X                  | Chgb: 12653                     | N/D             |                    | N/A                                      |                 |                              |
| Chromogranin C                               | X                  | Scg2: 20254                     | N/D             |                    | N/A                                      |                 |                              |
| <b>Others</b>                                |                    |                                 |                 |                    |                                          |                 |                              |
| Neurogenin 3                                 | N                  | Neurog3: 11925                  | Y               | 12456641           | N/A                                      |                 |                              |
| PC1/3                                        | X                  | Pcsk1: 18548                    | Y               | 12145326           | N/A                                      |                 |                              |

### Supplement 3: Gut hormone/receptor null models and the risk of early postnatal mortality

## Supplement 1:

### Material and Methods

*Oligonucleotides used to amplify PCSK1's 14 exons:*

Ex. 1 (232bp): (F) ACTCTTGTTCAAGCGAGTG; (R) GTTTCTTGAAAGTGGAAGT  
 Ex. 2 (510bp): (F) CTCAACCAATTCAACCCAATC; (R) CCCGTGACACAAGTTTACCTATG  
 Ex. 3 (196bp): (F) GAGGAAGTATACAGAGGTAG; (R) CATAGTCCTTCTGTAGGTAC  
 Ex. 4 (598bp): (F) TTATTTCAATGCCCACTGGTAC; (R) GTAGTTCAAAGAGAAGGAGCACAG  
 Ex. 5 (265bp): (F) AATGCTGCCACAGTGTATA; (R) ACATTTCTGAGCACTGGA  
 Ex. 6 (199bp): (F) ACCTATGCCCCATTAATTCA; (R) GCTATAGGGACAATCCTCTG  
 Ex. 7 (526bp): (F) TTCCTTCTGTGGTGTGTCAGTAGC; (R) AGCCTTAACTCCCATCCCTC  
 Ex. 8 (669bp): (F) GATTGAAGCAGAAAGAAAGAGAGG; (R) TCAGTCGTACCAAAGGTCAGTTA  
 Ex. 9 (172bp): (F) ACTCCTCACGTGTTCTCCCT; (R) TATCAAGCTTTTCTGGGCCT  
 Ex. 10 (339bp): (F) TCCCTGAATGGAGATGCT; (R) AGGAGATACTTACCTGGGCTC  
 Ex. 11 (268bp): (F) CGAAGGAAGTTTGGATATAC; (R) TTGAATCATTCAACTTACAC  
 Ex. 12 (224bp): (F) ATCAGATGCTAGAGTGTATC; (R) TCATCCTCTCATTTACTT  
 Ex. 13 (545bp): (F) CAGCTTTCCAAGAACACATCC; (R) CCATGTTTGACTTATTTCTCTGC  
 Ex. 14 (596bp): (F) GCTCCCAGTCTTGAAGTCTCTC; (R) CAACCACTTCAGACACAGGC

*PCR was performed using ~10ng of genomic DNA by standard methods: denaturation: 95°C/5:00 (denaturation: 95°C/0:30; annealing: T<sub>A</sub>°C/0:30; extension: 72°C/0:40) for 35 cycles, and a final extension: 72°C/7:00. Run exons #2, 4, 7, 8, 13, 14 at T<sub>A</sub> = 60°C; exons #1, 5, 6, 11 at T<sub>A</sub> = 53°C; and exons #3, 9, 10, 12 at T<sub>A</sub> = 55°C. DNA was sequenced bidirectionally using standard methods.*

*Transient transfection of expression clones.* cDNAs encoding the various PC1/3 mutant variants were transfected into HEK293 cells, plated the previous day at a density of 2 x 10<sup>5</sup> cells per well in 24-well plates. Cells were transfected in quadruplicate with 200ng/well of each plasmid DNA using Lipofectamine 2000 (Invitrogen). Five hours post-transfection, 1ml of growth medium was added to each well and incubation continued for an additional 24h. The medium was then replaced with 300µl of OptiMEM (Invitrogen) containing 100µg/ml bovine aprotinin (Desert Biologicals). Cells were incubated for an additional 16-24h before conditioned medium and cells were harvested. Conditioned medium was analyzed first by enzyme assay. Both cells and medium were then subjected to SDS-PAGE followed by Western blotting using primary antiserum against the amino terminus of mature mouse PC1/3 followed by goat anti-β-actin antiserum (Santa Cruz Biotechnology) as a loading control <sup>12</sup>. Western blots were then probed with horseradish peroxidase-coupled secondary antiserum. Visualization of immunoreactive protein was accomplished using the SuperSignal Dura Substrate kit (Thermo Scientific). All transfections were performed independently at least three times.

## Results

### *Database assessment of identified PCSK1 variants:*

None of the variants were present in 1092 individuals of diverse ethnicities sequenced by the 1000 Genomes project (Phase 1 Integrated Variant Call Set, supp table XX). Furthermore, none of the variants were present in the 6500 NHLBI exomes representing individuals in the United States of European and African ancestry (NHLBI GO Exome Sequencing Project (ESP), Seattle, WA (URL: <http://evs.gs.washington.edu/EVS/>) ESP6500SI accessed 2012-11-26). None of the variants were found as homozygous in 218 exomes sequenced at UCLA, which included 8 Turkish and 20 Arab individuals from ethnic groups not represented in 1000 Genomes or NHLBI. (In the UCLA exomes, a single Caucasian individual was heterozygous for p.G593R and a single Arab individual was heterozygous for p.R405X.)

### *The ethnic groups and number of samples in 1000 Genomes:*

| <b><u>population</u></b> | <b><u>description</u></b>                              | <b><u>samples</u></b> |
|--------------------------|--------------------------------------------------------|-----------------------|
| ASW                      | Americans of African Ancestry in SW USA                | 61                    |
| CEU                      | Utah Residents w/ Northern & Western European ancestry | 85                    |
| CHB                      | Han Chinese in Beijing, China                          | 97                    |
| CHS                      | Southern Han Chinese                                   | 100                   |
| CLM                      | Colombians from Medellin, Colombia                     | 60                    |
| FIN                      | Finnish in Finland                                     | 93                    |
| GBR                      | British in England and Scotland                        | 89                    |
| IBS                      | Iberian population in Spain                            | 14                    |
| JPT                      | Japanese in Tokyo, Japan                               | 89                    |
| LWK                      | Luhya in Webuye, Kenya                                 | 97                    |
| MXL                      | Mexican Ancestry from Los Angeles USA                  | 66                    |
| PUR                      | Puerto Ricans from Puerto Rico                         | 55                    |
| TSI                      | Toscans in Italia                                      | 98                    |
| YRI                      | Yoruba in Ibadan, Nigeria                              | 88                    |
